# Supplementary material for: Live imaging of collagen deposition during skin development and repair in a collagen I – GFP fusion transgenic zebrafish line
Source: PubMed Central journal article supplement (PMC6080847; doi:10.1016/j.ydbio.2018.06.001), 2018-09-01

# Supplementary figures

Fig S1

A

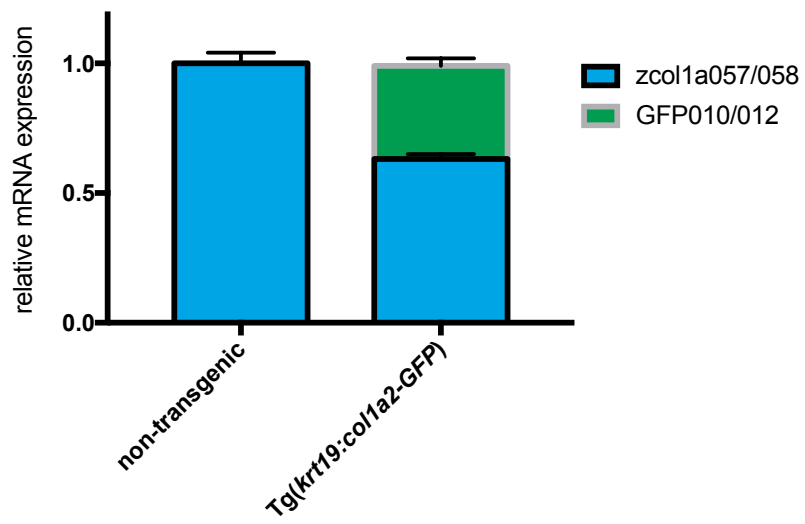

Fig S2

A 28 dpf

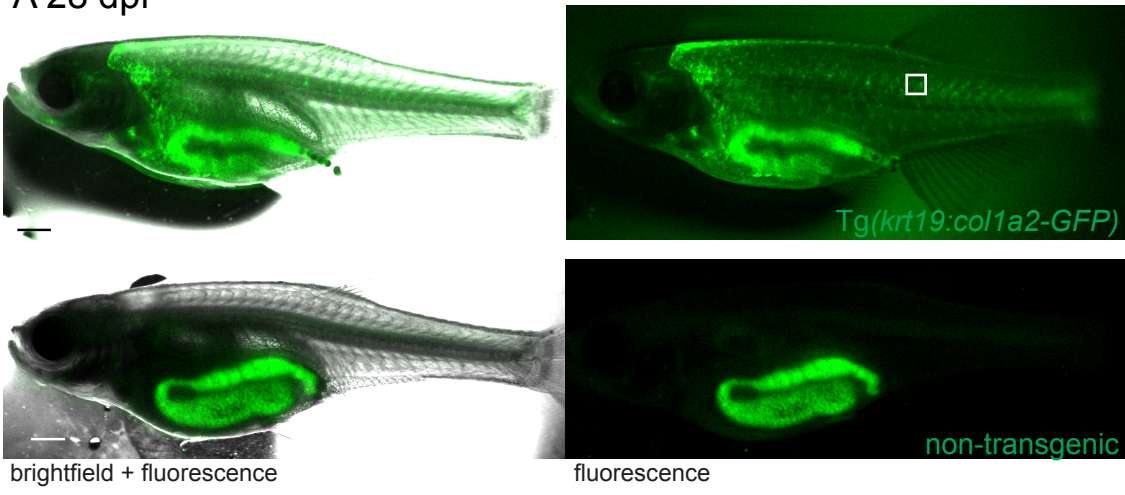

B

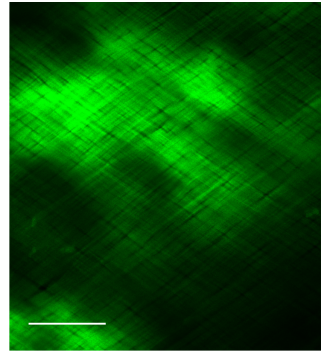

C 6 mopf

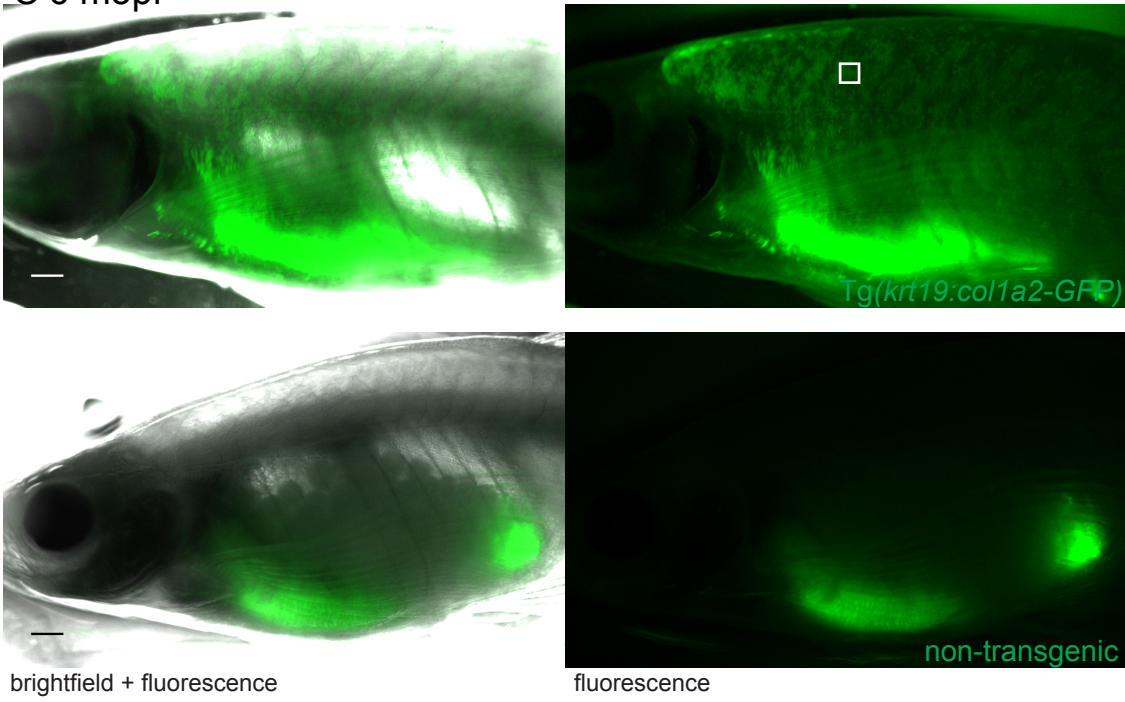

D

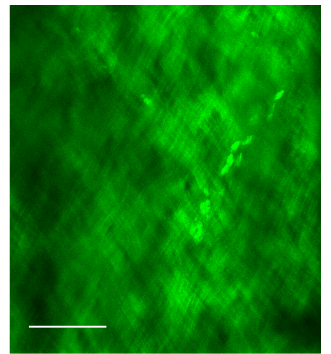

Fig S3

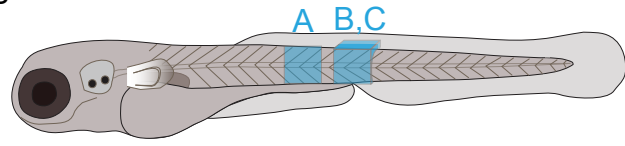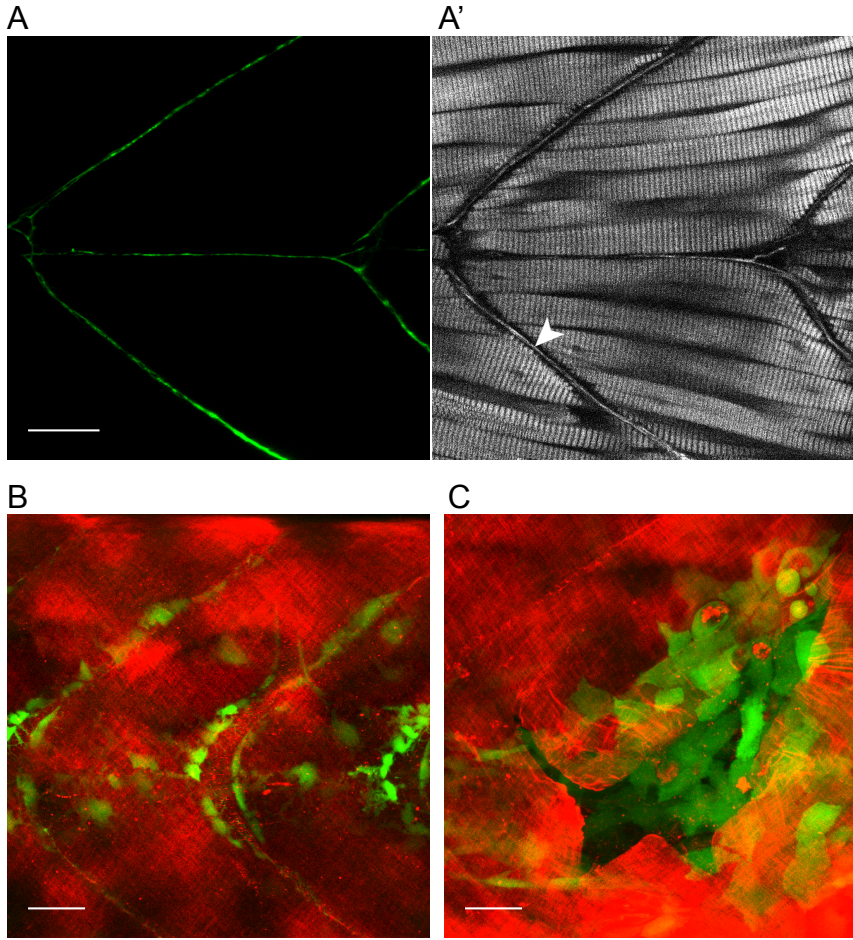

Fig S4

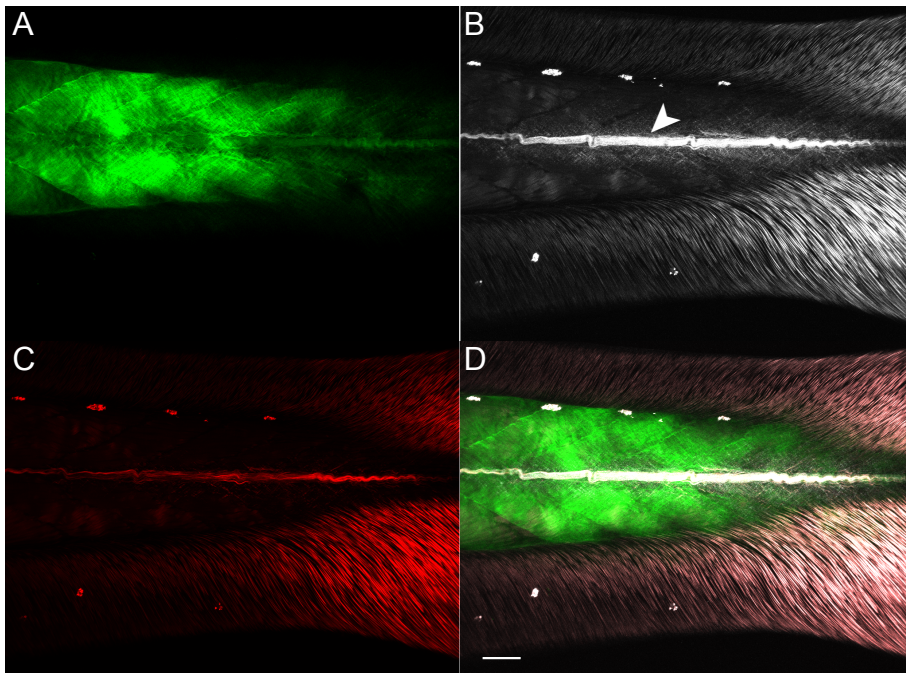

Fig S5

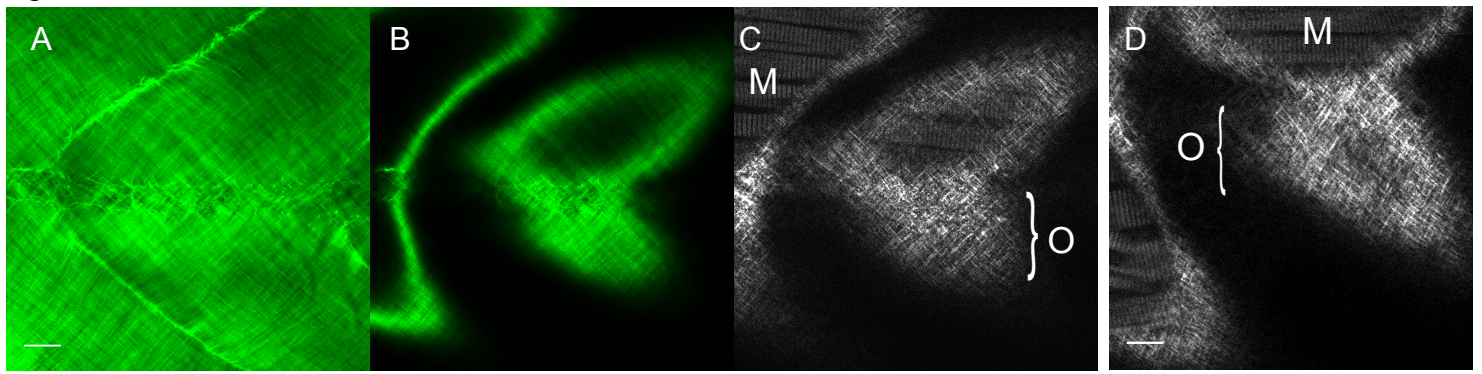

Fig S6

A 4 dpi

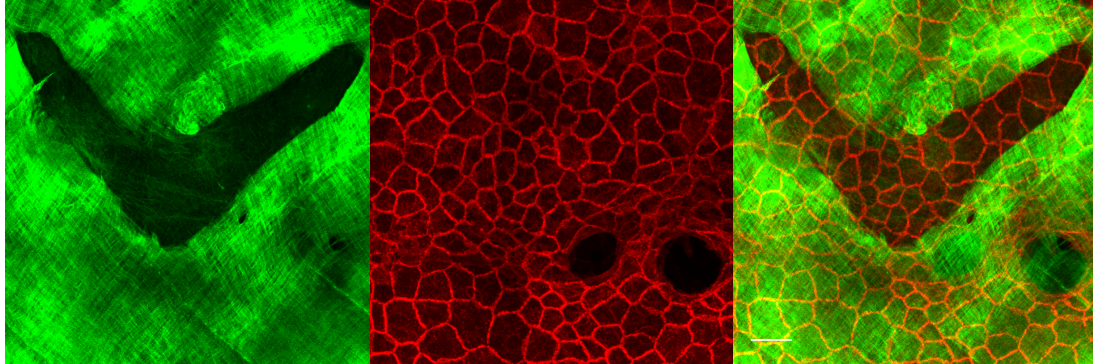

unwounded (8 dpf)

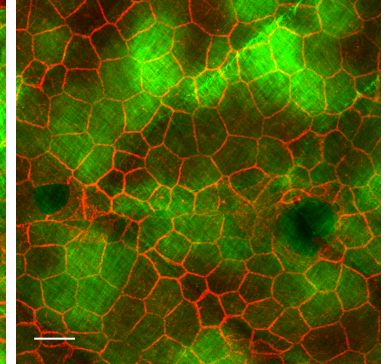

B 7 dpi

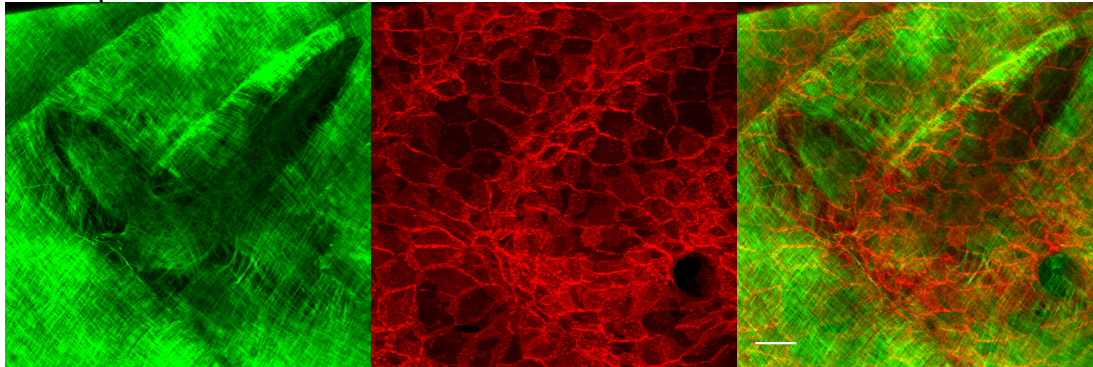

unwounded (11 dpf)

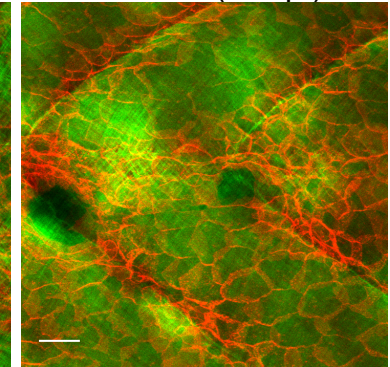

C 11 dpi

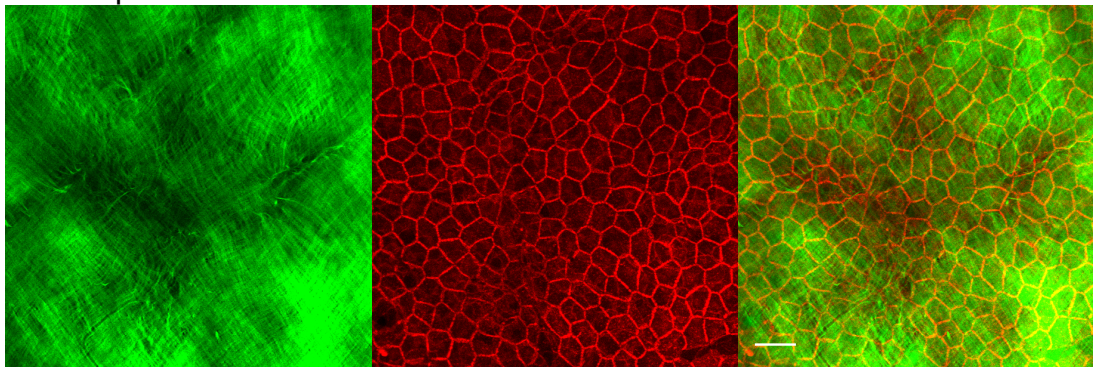

unwounded (15 dpf)

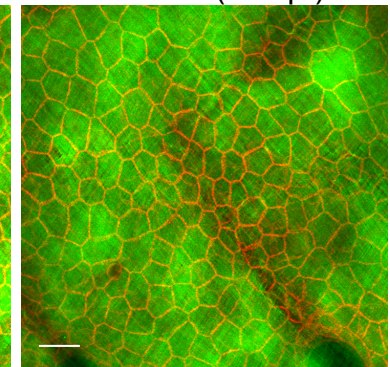

D 14 dpi

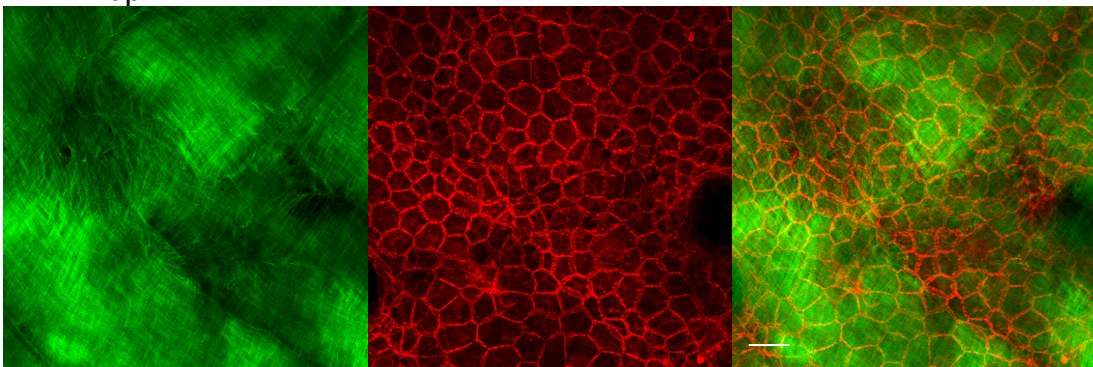

unwounded (18 dpf)

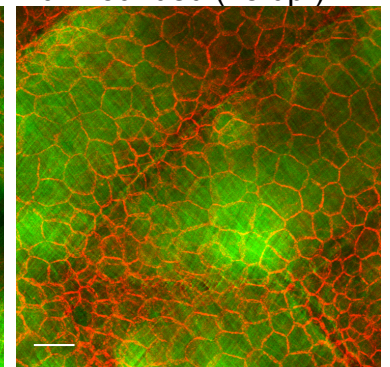

Supplement: mmc1.pdf [file mmc1.pdf]
